# Supplementary material
Source: PubMed Central journal article supplement (PMC7611047)
Supplement: EMS85150-supplement-Supplementary_figures.pdf [file EMS85150-supplement-Supplementary_figures.pdf]

## Supplementary Figure 1

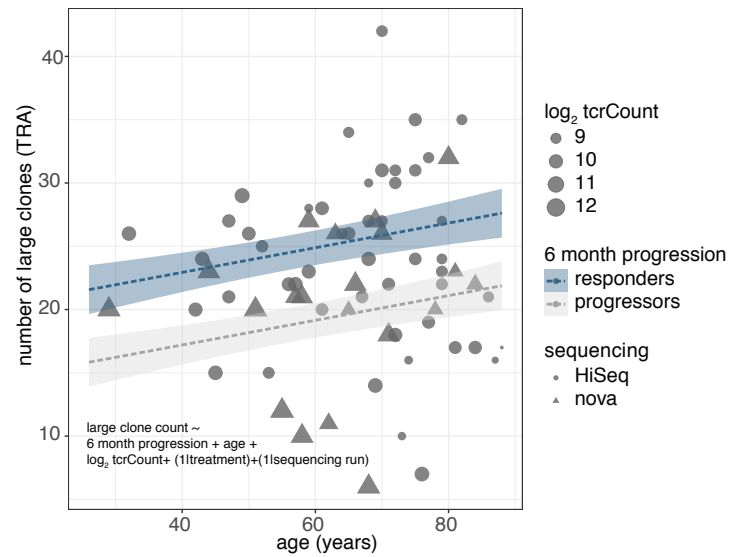

**SF1**, Fitting a linear mixed effect model where age and number of TCR sequenced are controlled whilst sequencing run and treatment are fitted as random effects. Controlling for these covariates, responders have an average of 5.7 more large clones (defined by TRA) on day 21 than patients who progress by 6 months. Fitted lines indicate responding large clone counts (dark blue) and those for progressors (ANOVA, F-statistic).

## Supplementary Figure 2

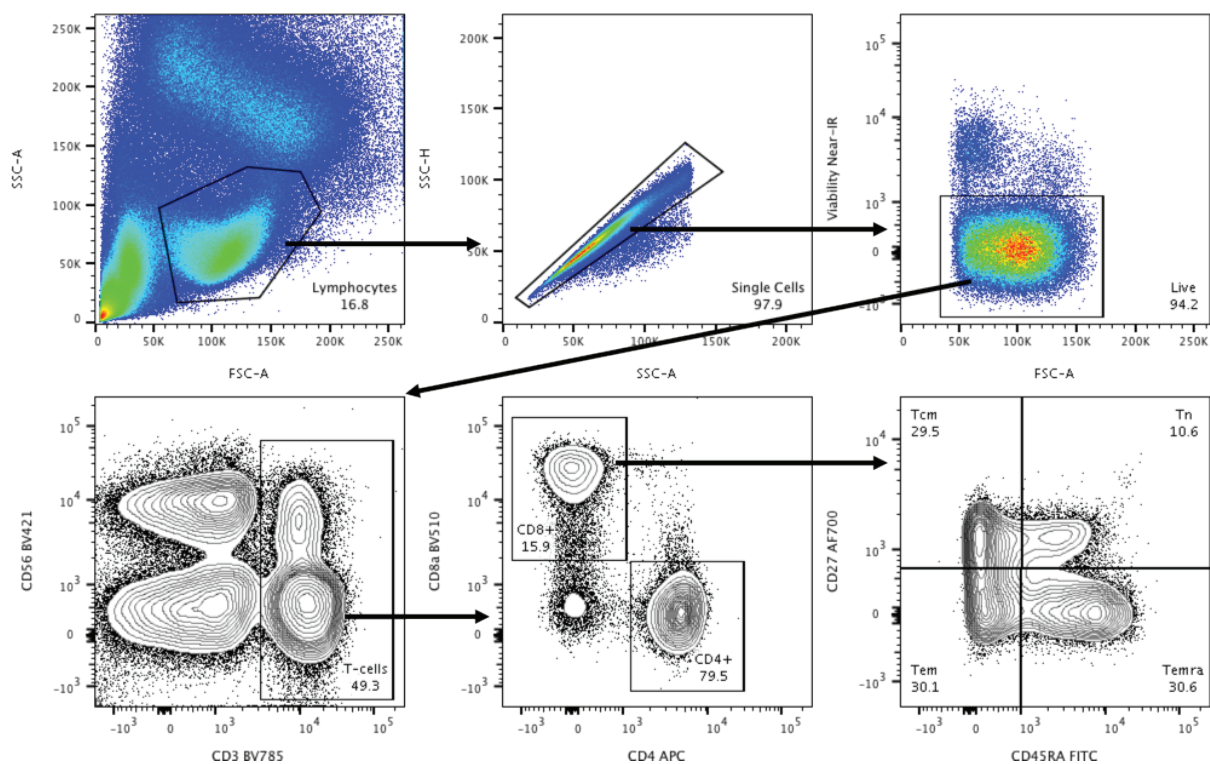

Gating strategy to identify CD8+ T-cell subsets from whole PBMCs

| Antibody                                       | Clone  | Conjugate | Supplier                |
|------------------------------------------------|--------|-----------|-------------------------|
| LIVE/DEAD™ Fixable Near-IR Dead Cell Stain Kit | n/a    | n/a       | Thermofisher scientific |
| Mouse anti-human CD3                           | UCHT1  | BV785     | Biolegend               |
| Mouse anti-human CD56                          | 5.1H11 | BV421     | Biolegend               |
| Mouse anti-human CD4                           | RPA-T4 | APC       | Biolegend               |
| Mouse anti-human CD8a                          | RPA-T8 | BV510     | Biolegend               |
| Mouse anti-human CD45RA                        | HI100  | FITC      | Becton Dickinson        |
| Mouse anti-human CD27                          | M-T271 | AF700     | Biolegend               |

## Supplementary Figure 3

a

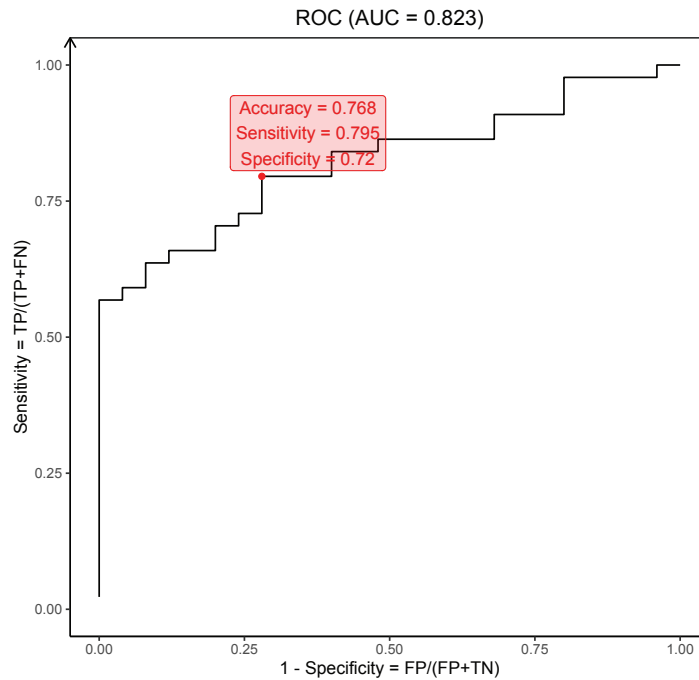

b

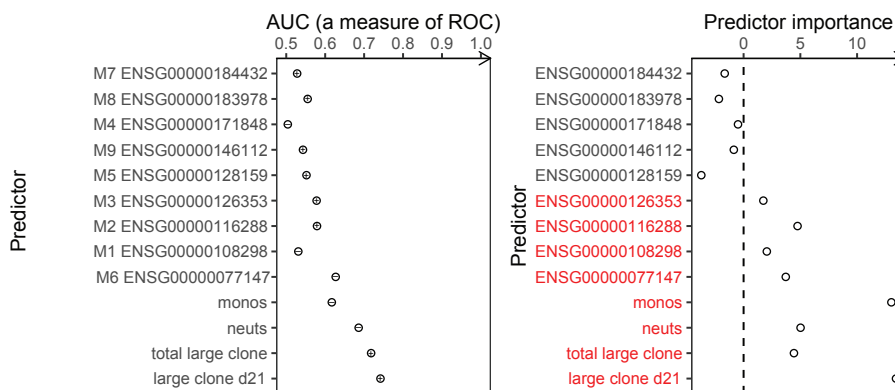

**a**, By combining the expression of the lead gene from ICB induced modules (M1:M9) at day 21, baseline monocyte and neutrophil counts, large clones at day 21 and total large clones (sum of those at baseline and at day 21) we can use random forest (RF) to build a model of outcome. We used 5 fold cross-validation (repeated 10 times) to find the best model with optimal parameters tuned.

**b**, Based on the RF model, we measured the importance for a predictor by the degree of decrease in accuracy removing that predictor (this measure is more robust than directly measuring a predictor by its predictive power). A high score in accuracy indicates a highly informative predictor. We next applied linear discriminant analysis to combine all identified informative predictors. We calculated linear discriminant scores (LD scores) used for patient response prediction. LD scores are a linear combination of predictors (thus with better prediction explanations); the performance (measured by AUC) of each combination was compared to prediction using individual predictors alone. Those highlighted in red are informative predictors as to ongoing response at six-months.
